# Supplementary material for: Beyond power: Multivariate discovery, replication, and interpretation of pleiotropic loci using summary association statistics
Source: bioRxiv or medRxiv preprint supplement (doi:10.1101/022269), 2019-04-11

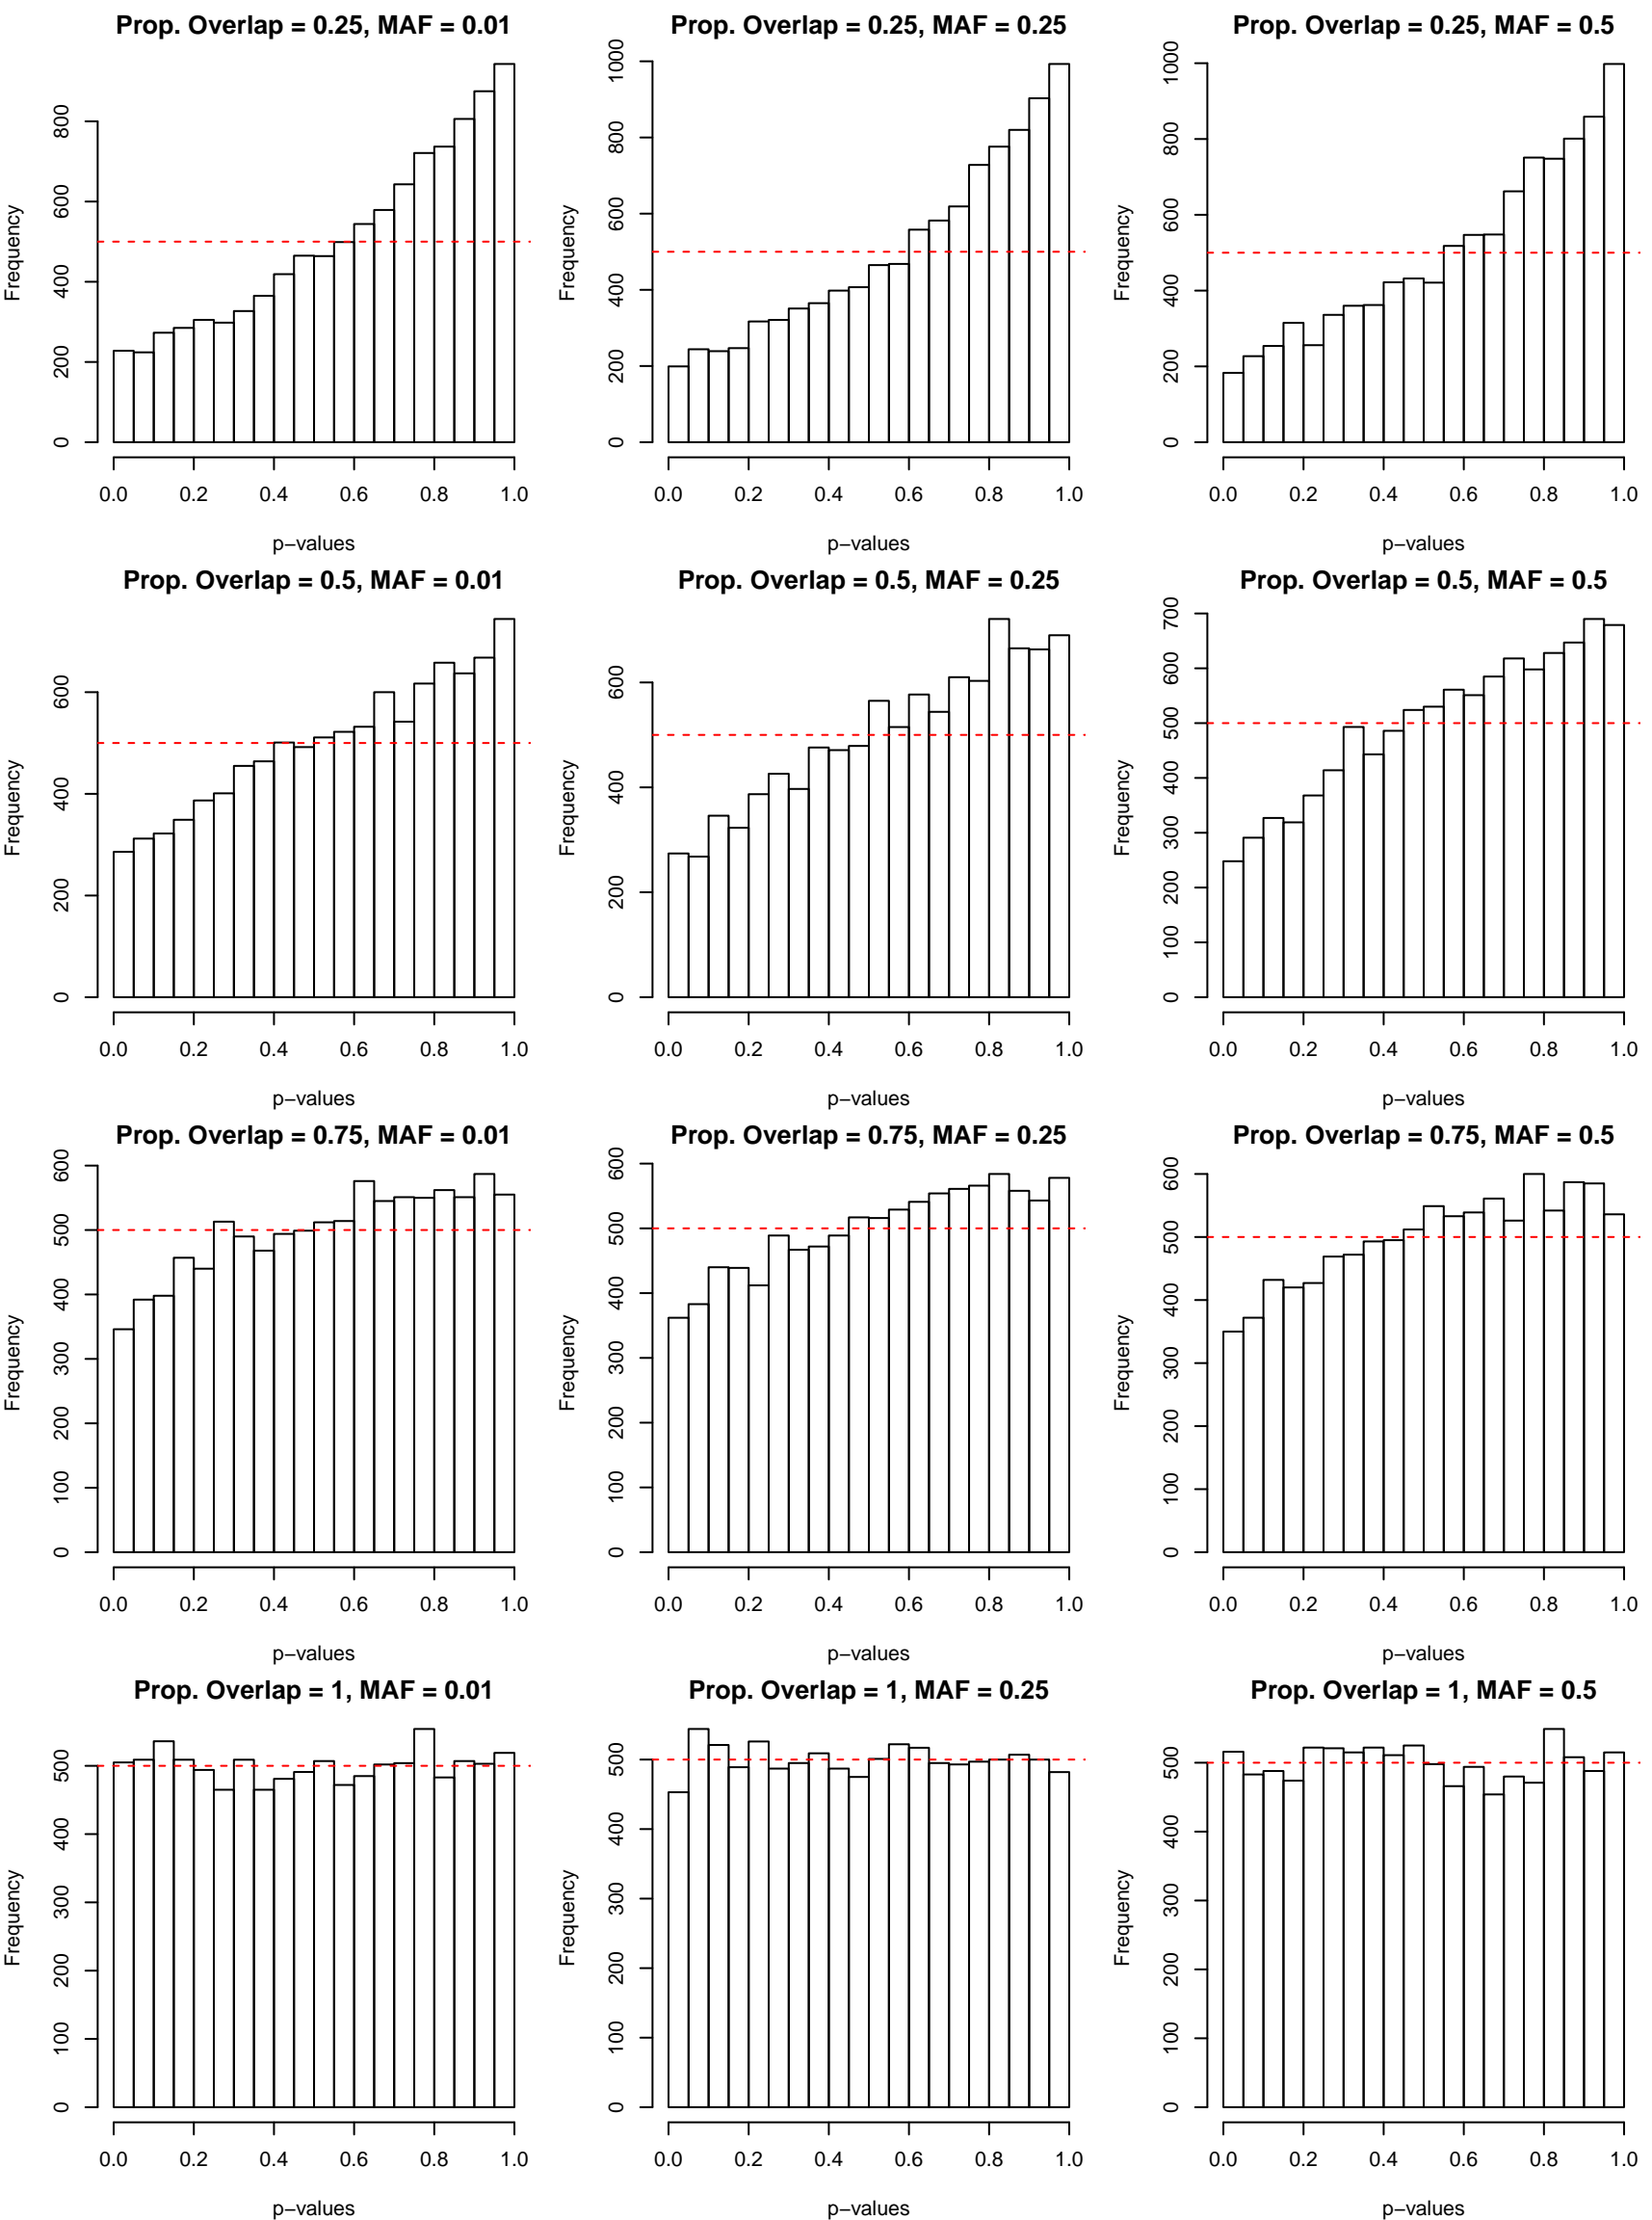

Supplement: Supplementary file [file 022269-12.pdf]
