# Supplementary material for: Beyond power: Multivariate discovery, replication, and interpretation of pleiotropic loci using summary association statistics
Source: bioRxiv or medRxiv preprint supplement (doi:10.1101/022269), 2019-04-11

**Prop. Overlap = 0.25, MAF = 0.01**

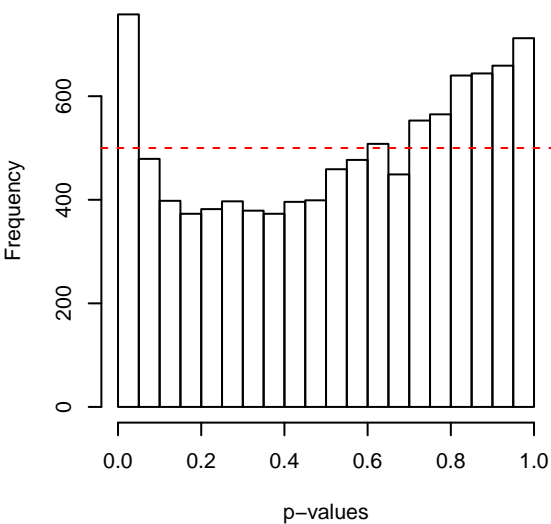

**Prop. Overlap = 0.25, MAF = 0.25**

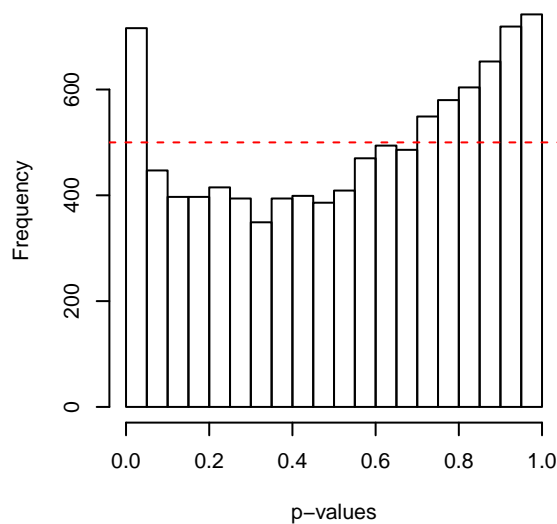

**Prop. Overlap = 0.25, MAF = 0.5**

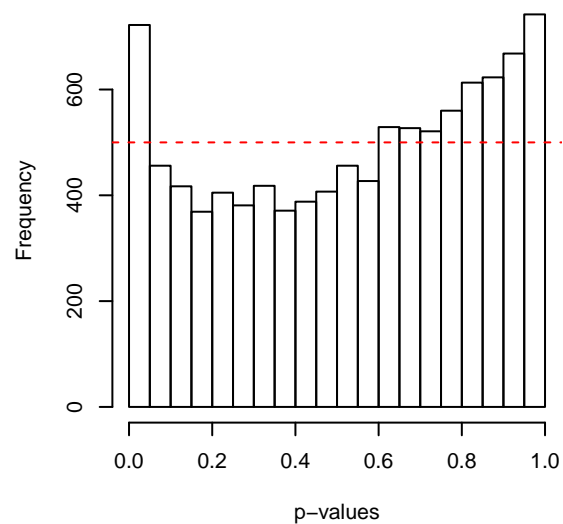

**Prop. Overlap = 0.5, MAF = 0.01**

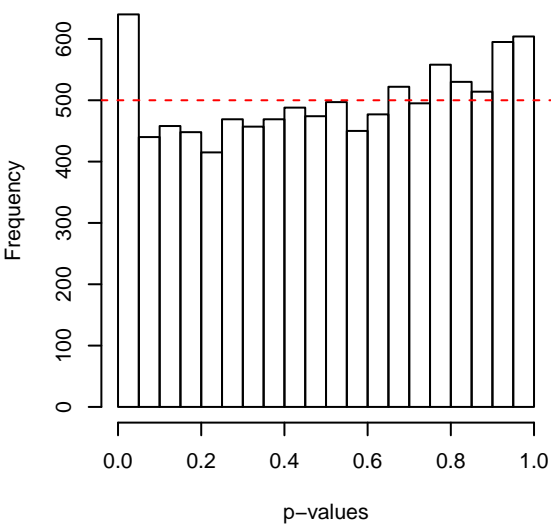

**Prop. Overlap = 0.5, MAF = 0.25**

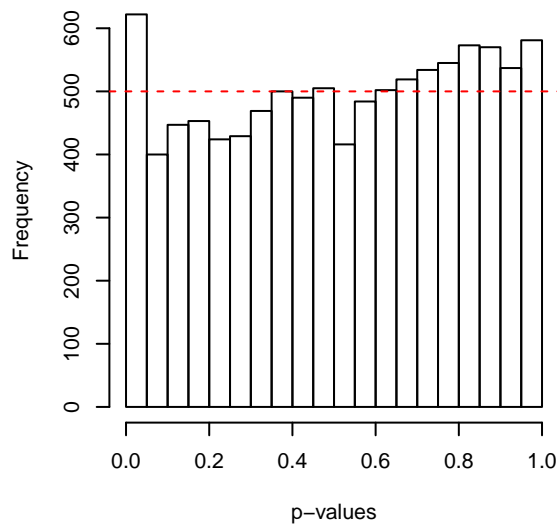

**Prop. Overlap = 0.5, MAF = 0.5**

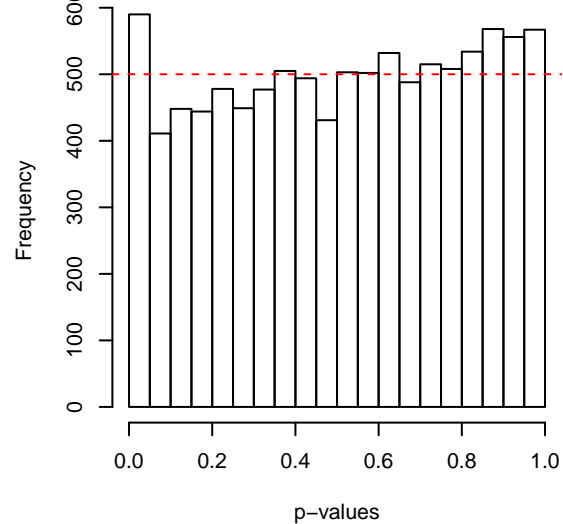

**Prop. Overlap = 0.75, MAF = 0.01**

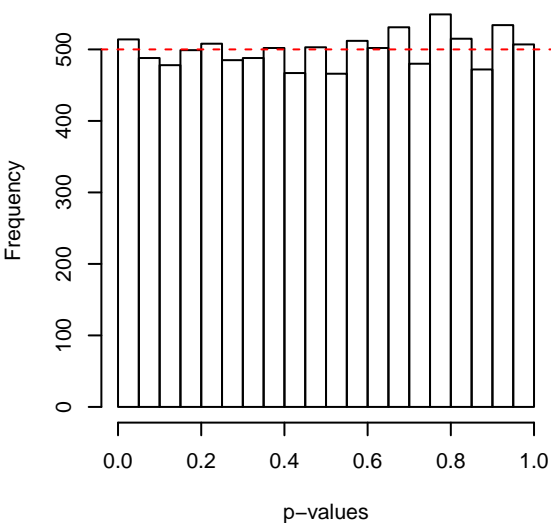

**Prop. Overlap = 0.75, MAF = 0.25**

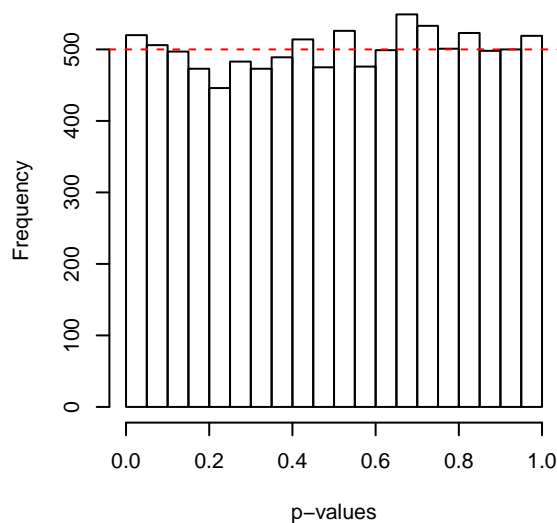

**Prop. Overlap = 0.75, MAF = 0.5**

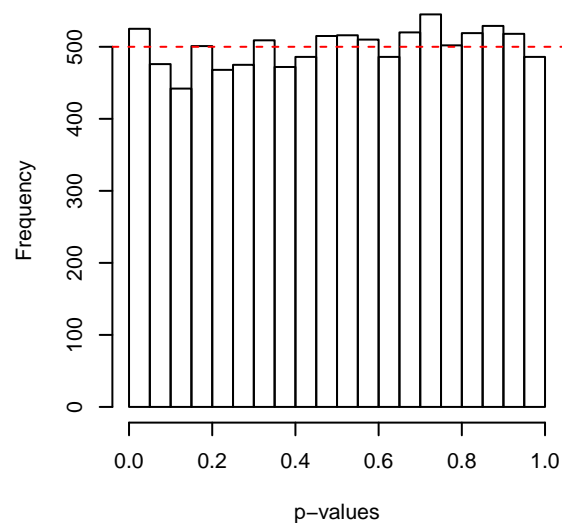

**Prop. Overlap = 1, MAF = 0.01**

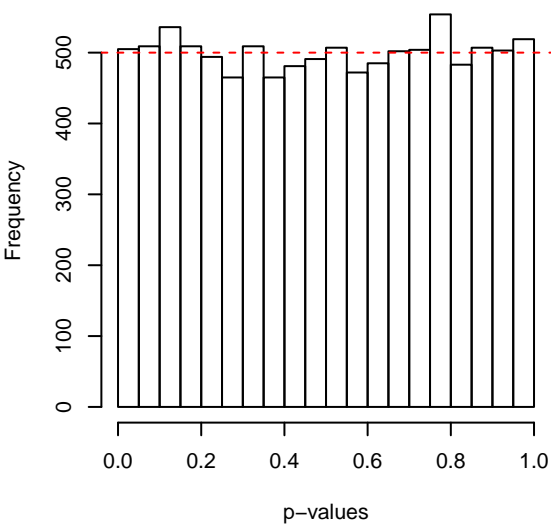

**Prop. Overlap = 1, MAF = 0.25**

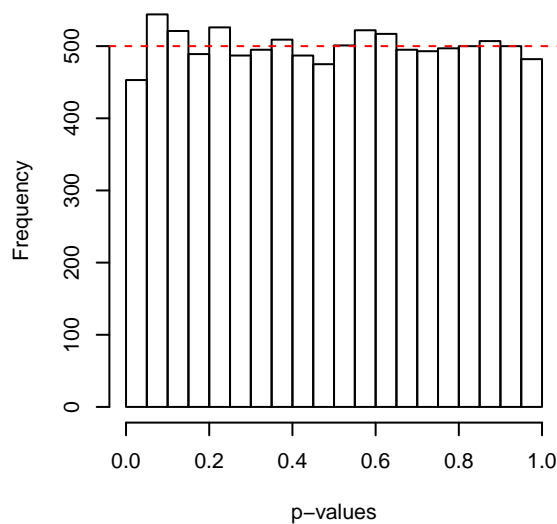

**Prop. Overlap = 1, MAF = 0.5**

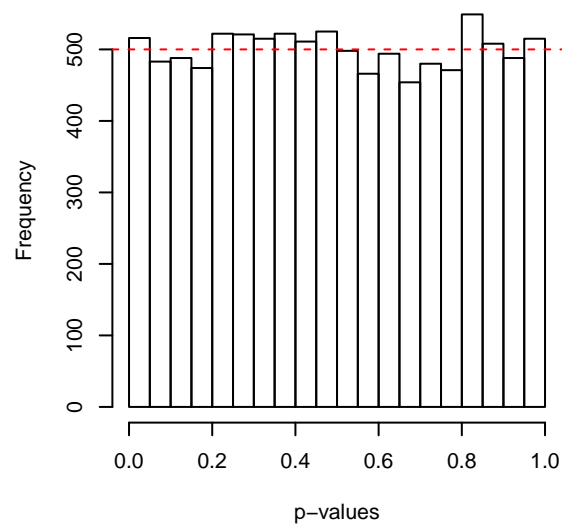

Supplement: Supplementary file [file 022269-13.pdf]
